# Supplementary material for: Chlorine management of a carbon counter electrode for high performance printable perovskite solar cells
Source: Royal Society of Chemistry journal article supplement (doi:10.1039/d1tc00890k), 2021-01-01
Supplement: d1tc00890k1.pdf [file d1tc00890k1.pdf]

Supplementary Materials for

## Chlorine Management of Carbon Counter Electrode for High Performance Printable Perovskite Solar Cells

*Xinmiao Chen<sup>1</sup>, Lei Lu<sup>1</sup>, Dawei Gu<sup>1</sup>, Xiaoyan Zhang<sup>2</sup>, He Yu<sup>1</sup>, Yunjun Rui<sup>1</sup>, Feng Chen<sup>1</sup>, Jiwei Hou<sup>1</sup> and Ying Yang<sup>\*1</sup>*

1. Department of Physics, School of Physical and Mathematical Sciences, Nanjing Tech University, Nanjing 210009, Jiangsu, P.R. China.
2. College of Chemical Engineering, Nanjing Tech University, Nanjing 210009, Jiangsu, P.R. China.

\*Correspondence: [yingyang@njtech.edu.cn](mailto:yingyang@njtech.edu.cn); Tel.: +86-1996-206-5272

Table.1S The weight percentage for C and Cl in C-Cl<sub>x</sub> (x=0, 0.2, 0.4, 0.6) samples by EDX.

| Sample                                   | C     | C-Cl <sub>0.2</sub> | C-Cl <sub>0.4</sub> | C-Cl <sub>0.6</sub> |
|------------------------------------------|-------|---------------------|---------------------|---------------------|
| C /weight%                               | 86.66 | 85.33               | 74.91               | 77.97               |
| Cl /weight%                              | 0.06  | 0.09                | 0.08                | 0.1                 |
| Ratio (m <sub>Cl</sub> :m <sub>C</sub> ) | 0.07% | 0.105%              | 0.11%               | 0.13%               |

Table 2S The statistical average values of the  $V_{oc}$ ,  $J_{sc}$ ,  $FF$ ,  $PCE$  based on 80 PSCs for a reverse scan of voltage.

|                  | $V_{oc}$ (V)  | $J_{sc}$ (mA/cm <sup>2</sup> ) | $FF$          | $PCE$ (%)      |
|------------------|---------------|--------------------------------|---------------|----------------|
| <b>C-r</b>       | <b>0.7653</b> | <b>17.7064</b>                 | <b>0.5873</b> | <b>8.0948</b>  |
| <b>C-Cl0.2-r</b> | <b>0.8055</b> | <b>20.5272</b>                 | <b>0.6173</b> | <b>10.0514</b> |
| <b>C-Cl0.4-r</b> | <b>0.8521</b> | <b>20.8032</b>                 | <b>0.6630</b> | <b>11.7477</b> |
| <b>C-Cl0.6-r</b> | <b>0.8246</b> | <b>21.4088</b>                 | <b>0.6105</b> | <b>10.5706</b> |

Table 3S The statistical average values of the  $V_{oc}$ ,  $J_{sc}$ ,  $FF$ ,  $PCE$  based on 80 PSCs for a forward scan of voltage.

|                             | $V_{oc}$ (V)  | $J_{sc}$ (mA/cm <sup>2</sup> ) | $FF$          | $PCE$ (%)      |
|-----------------------------|---------------|--------------------------------|---------------|----------------|
| <b>C-f</b>                  | <b>0.6949</b> | <b>19.8089</b>                 | <b>0.3903</b> | <b>5.1963</b>  |
| <b>C-Cl<sub>0.2</sub>-f</b> | <b>0.7172</b> | <b>21.6372</b>                 | <b>0.5041</b> | <b>7.8333</b>  |
| <b>C-Cl<sub>0.4</sub>-f</b> | <b>0.7884</b> | <b>21.9205</b>                 | <b>0.5939</b> | <b>10.3268</b> |
| <b>C-Cl<sub>0.6</sub>-f</b> | <b>0.7394</b> | <b>22.3737</b>                 | <b>0.5408</b> | <b>8.8818</b>  |

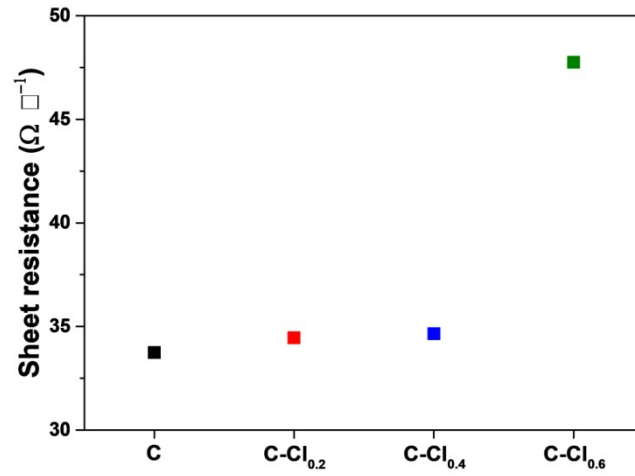

Figure S1. The sheet resistance of C-Cl<sub>x</sub> (x=0, 0.2, 0.4, 0.6) samples.

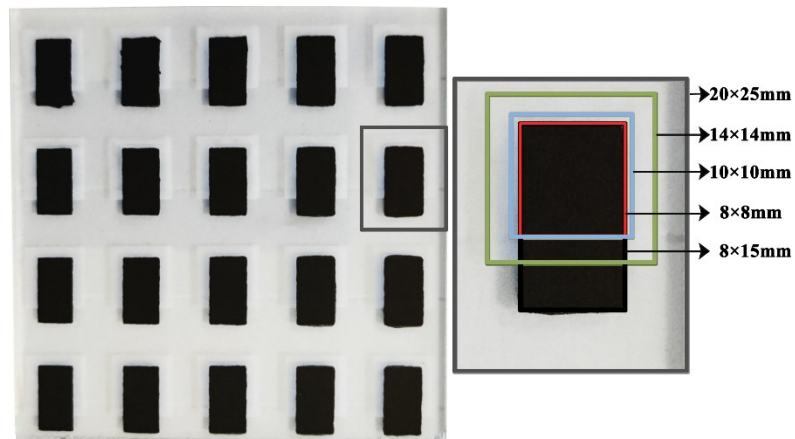

Fig.2S The integrated module of 20 C-PSCs and the characters of one cell.

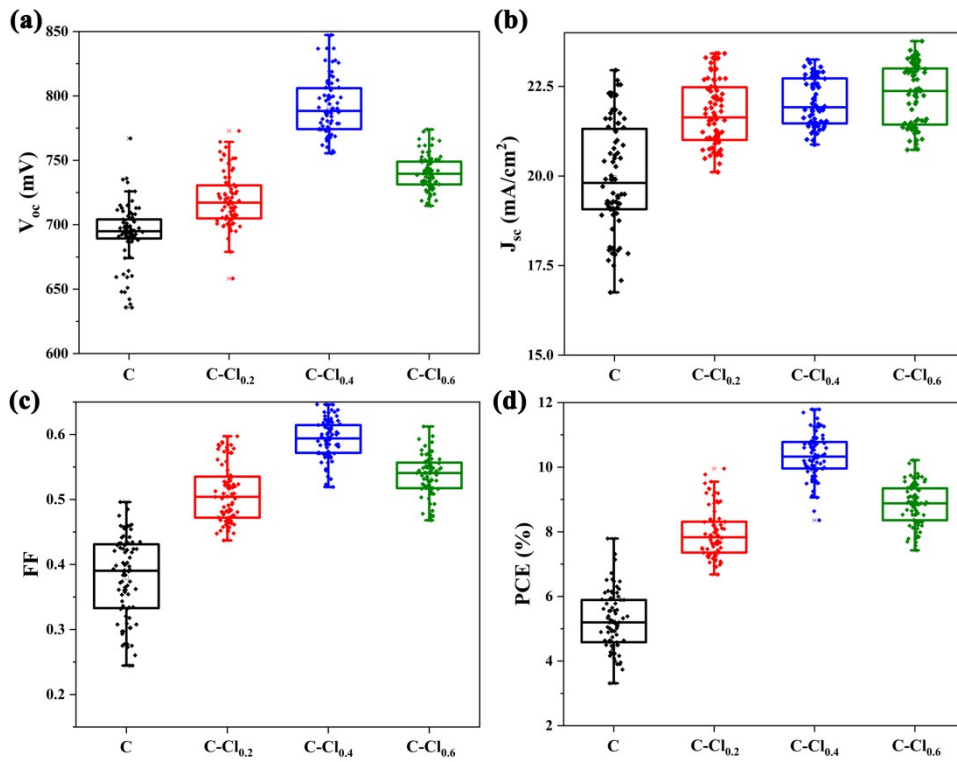

Fig.3S The statistical data of the  $V_{oc}$ ,  $J_{sc}$ ,  $FF$  and  $PCE$  of a forward scan for 80 cells.

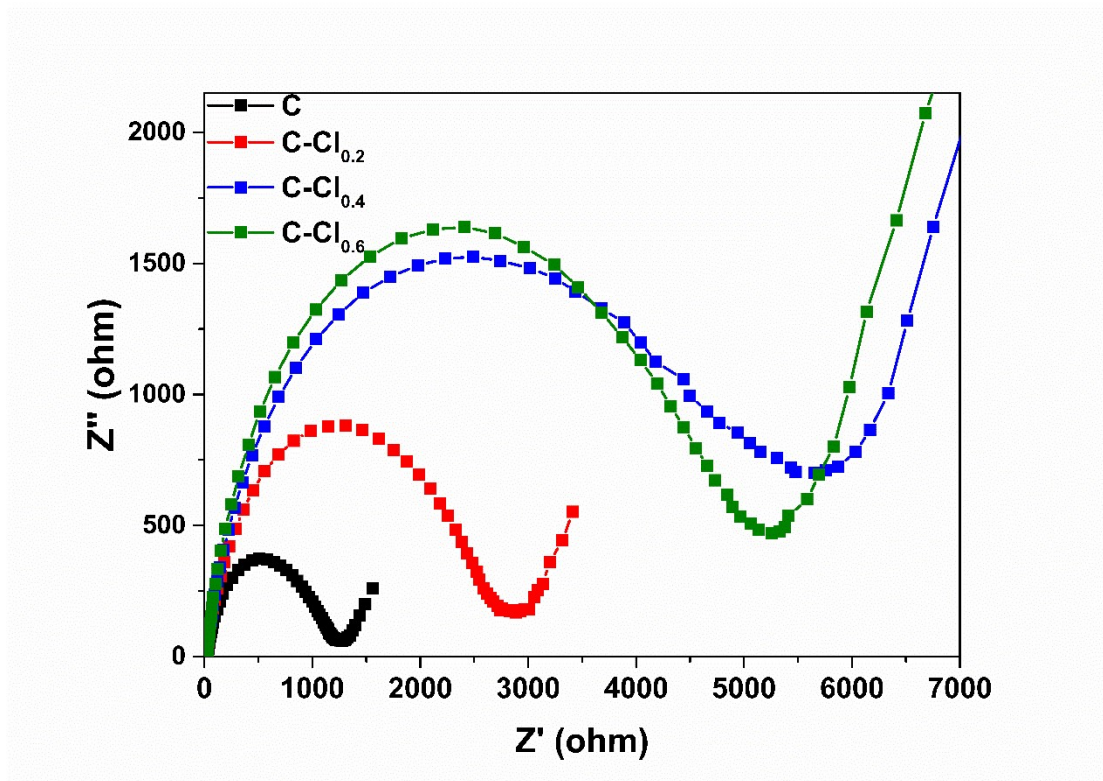

Fig.4S The EIS curves of C-PSCs based on C, C-Cl<sub>0.2</sub>, C-Cl<sub>0.4</sub> and C-Cl<sub>0.6</sub> counter

electrodes respectively.

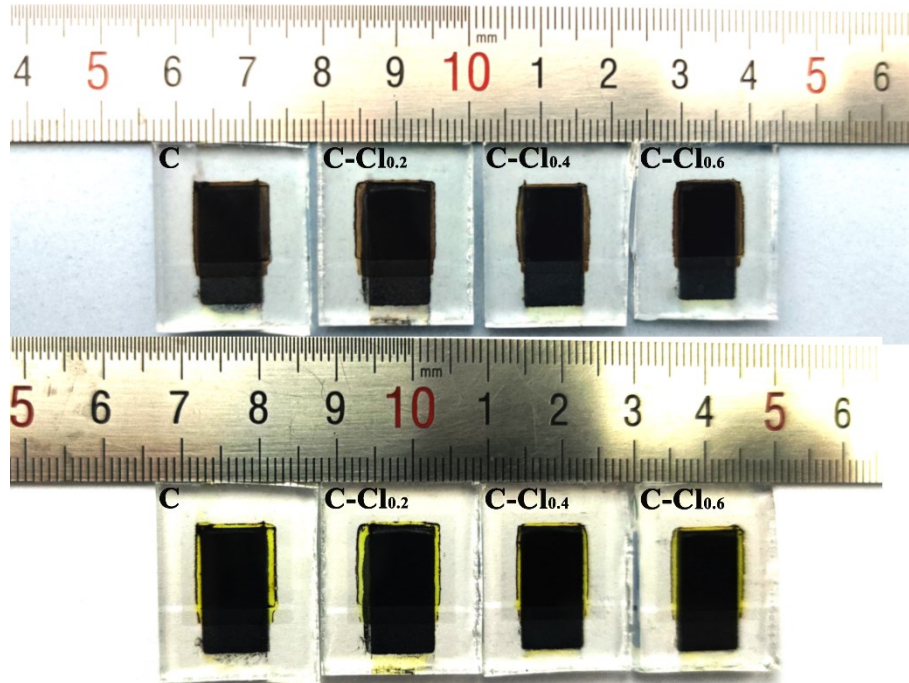

Fig.5S The photograph of the PSCs based on C, C-Cl<sub>0.2</sub>, C-Cl<sub>0.4</sub> and C-Cl<sub>0.6</sub> CEs stored at ambient air condition without protection for 0 day and 30 days.
